# Supplementary material for: Early prediction and identification for severe patients during the pandemic of COVID-19: A severe COVID-19 risk model constructed by multivariate logistic regression analysis
Source: PubMed Central journal article supplement (PMC7567445; doi:10.7189/jogh.10.020510), 2020-12
Supplement: jogh-10-020510-s001.pdf [file jogh-10-020510-s001.pdf]

## Online Supplementary Document

**Table S1.** Grouping criteria based on the clinical typing standard of COVID-19

| Group         | Clinical type | Clinical typing standard of COVID-19*                                                                                                                                                                                                                                                                                                                                                                          |
|---------------|---------------|----------------------------------------------------------------------------------------------------------------------------------------------------------------------------------------------------------------------------------------------------------------------------------------------------------------------------------------------------------------------------------------------------------------|
| Mild group†   | Mild type     | Patients with slight clinical symptoms and no sign of pneumonia on imaging.                                                                                                                                                                                                                                                                                                                                    |
|               | Moderate type | Patients with fever, respiratory tract and other symptoms, and pneumonia changes on imaging.                                                                                                                                                                                                                                                                                                                   |
| Severe group‡ | Serious type  | Patients presenting with any of the following:<br>(1) polypnea, respiratory rate $\geq 30$ /min; (2) finger oxygen saturation $\leq 93\%$ in resting condition; (3) arterial partial pressure of oxygen ( $\text{PaO}_2$ )/fraction of inspired oxygen ( $\text{FiO}_2$ ) $\leq 300$ mmHg (1mmHg=0.133kPa); (4) pulmonary imaging demonstrates that the lesions expanded rapidly more than 50% in 24~48 hours. |
|               | Critical type | Patients meeting any of the following:<br>(1) respiratory failure and requiring for mechanical ventilation; (2) shock; (3) accompanying with other organ failure and needing for ICU care and treatment.                                                                                                                                                                                                       |

\*The clinical typing standard of COVID-19 were derived from the “Diagnosis and Treatment Protocol for Novel Coronavirus Pneumonia (Trial Version 7)” issued by the National Health Commission of China.

†The mild group included all patients of mild type and moderate type.

‡The severe group included all patients of serious type and critical type.

**Table S2.** Differences of extreme values\* of laboratory parameters between the two groups

|                                                      | All patients (n=40)    | Mild group (n=19)      | Severe group (n=21)    | P value |
|------------------------------------------------------|------------------------|------------------------|------------------------|---------|
| Maximum white blood cell count, × 10 <sup>9</sup> /L | 10.99 (7.94–16.18)     | 8.26 (7.01–12.74)      | 14.07 (9.85–18.83)     | 0.006   |
| >10                                                  | 22 (55.0%)             | 6 (31.6%)              | 16 (76.2%)             | 0.005   |
| Minimum lymphocyte count, × 10 <sup>9</sup> /L       | 0.55 (0.31–1.07)       | 0.83 (0.57–1.58)       | 0.32 (0.26–0.52)       | <0.001  |
| <0.8                                                 | 27 (67.5%)             | 8 (42.1%)              | 19 (90.5%)             | 0.001   |
| Maximum neutrophil count, × 10 <sup>9</sup> /L       | 8.77 (6.39–14.68)      | 6.51 (4.96–10.13)      | 12.04 (8.18–17.35)     | 0.002   |
| >7.5                                                 | 24 (60.0%)             | 7 (36.8%)              | 17 (81.0%)             | 0.004   |
| Maximum neutrophil lymphocyte ratio                  | 13.51 (4.50–25.15)     | 7.32 (3.52–12.27)      | 23.91 (14.58–60.65)    | <0.001  |
| Minimum platelet count, × 10 <sup>9</sup> /L         | 147.50 (105.00–183.75) | 185.00 (149.00–226.50) | 104.00 (70.00–153.00)  | 0.001   |
| <100                                                 | 9 (22.5%)              | 0 (0.0%)               | 9 (42.9%)              | 0.001   |
| Minimum haemoglobin, g/L                             | 123.00 (106.75–134.50) | 128.00 (124.00–137.00) | 98.00 (79.00–123.00)   | <0.001  |
| <120                                                 | 17 (42.5%)             | 2 (10.5%)              | 15 (71.4%)             | <0.001  |
| Minimum albumin, g/L                                 | 32.30 (29.13–35.80)    | 35.80 (33.60–40.30)    | 29.20 (27.60–31.75)    | <0.001  |
| <35                                                  | 28 (70.0%)             | 9 (47.4%)              | 19 (90.5%)             | 0.003   |
| Maximum globulin, g/L                                | 34.95 (32.03–39.45)    | 33.30 (31.30–36.00)    | 38.30 (33.80–44.85)    | 0.007   |
| >32                                                  | 30 (75.0%)             | 12 (63.2%)             | 18 (85.7%)             | 0.148   |
| Maximum alanine aminotransferase, U/L                | 95.00 (45.25–143.50)   | 50.00 (37.00–98.00)    | 124.00 (93.00–195.00)  | 0.001   |
| >40                                                  | 31 (77.5%)             | 11 (57.9%)             | 20 (95.2%)             | 0.007   |
| Maximum aspartate aminotransferase, U/L              | 56.00 (34.25–81.75)    | 35.00 (33.00–52.00)    | 72.00 (57.00–120.50)   | <0.001  |
| >40                                                  | 25 (62.5%)             | 7 (36.8%)              | 18 (85.7%)             | 0.001   |
| Maximum total bilirubin, μmol/L                      | 22.79 (14.13–39.40)    | 17.10 (13.00–22.38)    | 34.80 (20.70–57.15)    | 0.001   |
| >17.1                                                | 24 (60.0%)             | 8 (42.1%)              | 16 (76.2%)             | 0.028   |
| Maximum blood urea nitrogen, mmol/L                  | 6.45 (4.97–9.64)       | 5.87 (4.40–7.07)       | 7.44 (5.90–18.34)      | 0.006   |
| >7.5                                                 | 12 (30.0%)             | 2 (10.5%)              | 10 (47.6%)             | 0.011   |
| Maximum creatinine, μmol/L                           | 77.95 (62.33–89.98)    | 77.20 (62.70–80.60)    | 85.90 (57.80–97.10)    | 0.189   |
| >104                                                 | 5 (12.5%)              | 1 (5.3%)               | 4 (19.0%)              | 0.345   |
| Maximum C-reactive protein, mg/L                     | 25.07 (8.38–59.17)     | 20.30 (4.20–35.55)     | 54.56 (9.35–105.55)    | 0.031   |
| >5                                                   | 33 (82.5%)             | 14 (73.7%)             | 19 (90.5%)             | 0.226   |
| †Maximum creatine kinase, U/L                        | 59.00 (38.00–106.00)   | 45.00 (37.00–85.00)    | 67.00 (38.00–187.25)   | 0.393   |
| >198                                                 | 4 (11.4%)              | 0 (0.0%)               | 4 (19.0%)              | 0.133   |
| †Maximum creatine kinase MB, U/L                     | 12.50 (8.00–15.95)     | 8.50 (8.00–13.20)      | 13.80 (8.50–19.70)     | 0.041   |
| >18                                                  | 5 (14.3%)              | 0 (0.0%)               | 5 (23.8%)              | 0.069   |
| †Maximum lactate dehydrogenase, U/L                  | 562.0 (400.5–794.0)    | 414.0 (308.0–544.0)    | 715.0 (540.25–1047.75) | 0.002   |
| >245                                                 | 27 (77.1%)             | 9 (64.3%)              | 18 (85.7%)             | 0.221   |
| †Maximum prothrombin time, s                         | 11.90 (11.40–14.35)    | 11.35 (11.20–12.55)    | 12.50 (11.80–16.30)    | 0.118   |
| >13.0                                                | 9 (26.5%)              | 1 (7.7%)               | 8 (38.1%)              | 0.107   |
| †Maximum fibrinogen, g/L                             | 4.82 (4.55–5.69)       | 4.55 (3.85–5.43)       | 5.06 (4.71–5.76)       | 0.035   |

|                                           |                   |                  |                    |        |
|-------------------------------------------|-------------------|------------------|--------------------|--------|
| >4.0                                      | 26 (76.5%)        | 7 (53.8%)        | 19 (90.5%)         | 0.033  |
| †Maximum fibrin degradation product, mg/L | 6.70 (4.00–23.85) | 3.80 (2.85–4.25) | 19.50 (6.40–62.30) | <0.001 |
| >5.0                                      | 17 (50.0%)        | 1 (7.7%)         | 16 (76.2%)         | <0.001 |
| †Maximum D-dimer, mg/L                    | 2.78 (1.22–11.01) | 1.14 (0.94–1.46) | 8.12 (2.78–21.74)  | <0.001 |
| >0.5                                      | 29 (85.3%)        | 10 (76.9%)       | 19 (90.5%)         | 0.348  |
| ‡Albuminuria                              | 19 (47.5%)        | 4 (21.1%)        | 15 (71.4%)         | 0.001  |
| ‡Hematuria                                | 13 (32.5%)        | 2 (10.5%)        | 11 (52.4%)         | 0.005  |
| ‡Urine leukocyte                          | 5 (12.5%)         | 1 (5.3%)         | 4 (19.0%)          | 0.345  |

Continuous variables were presented as median (interquartile range) and compared by Mann-Whitney U test.

Categorical variables were presented as numbers (percentage) and compared by Fisher's exact test.

\*Extreme value referred to the maximum or minimum value of laboratory tests during hospitalization.

†These laboratory indicators were detected in only 34 cases.

‡Albuminuria, hematuria, and urine leukocyte were from routine urinalysis during hospitalization.
